# Supplementary material
Source: PubMed Central journal article supplement (PMC3324946)

**Supplemental Figure 1.** Imperial stained 2D-SDS-PAGE gels were used to examine changes in protein expression and for alignment with the Western blots displayed in Figure 2, which were probed with anti-acetyl-Lys antibody. Once aligned with paired Western blots, these imperial stained gels were used to excise protein spots of interest for MS/MS analysis.

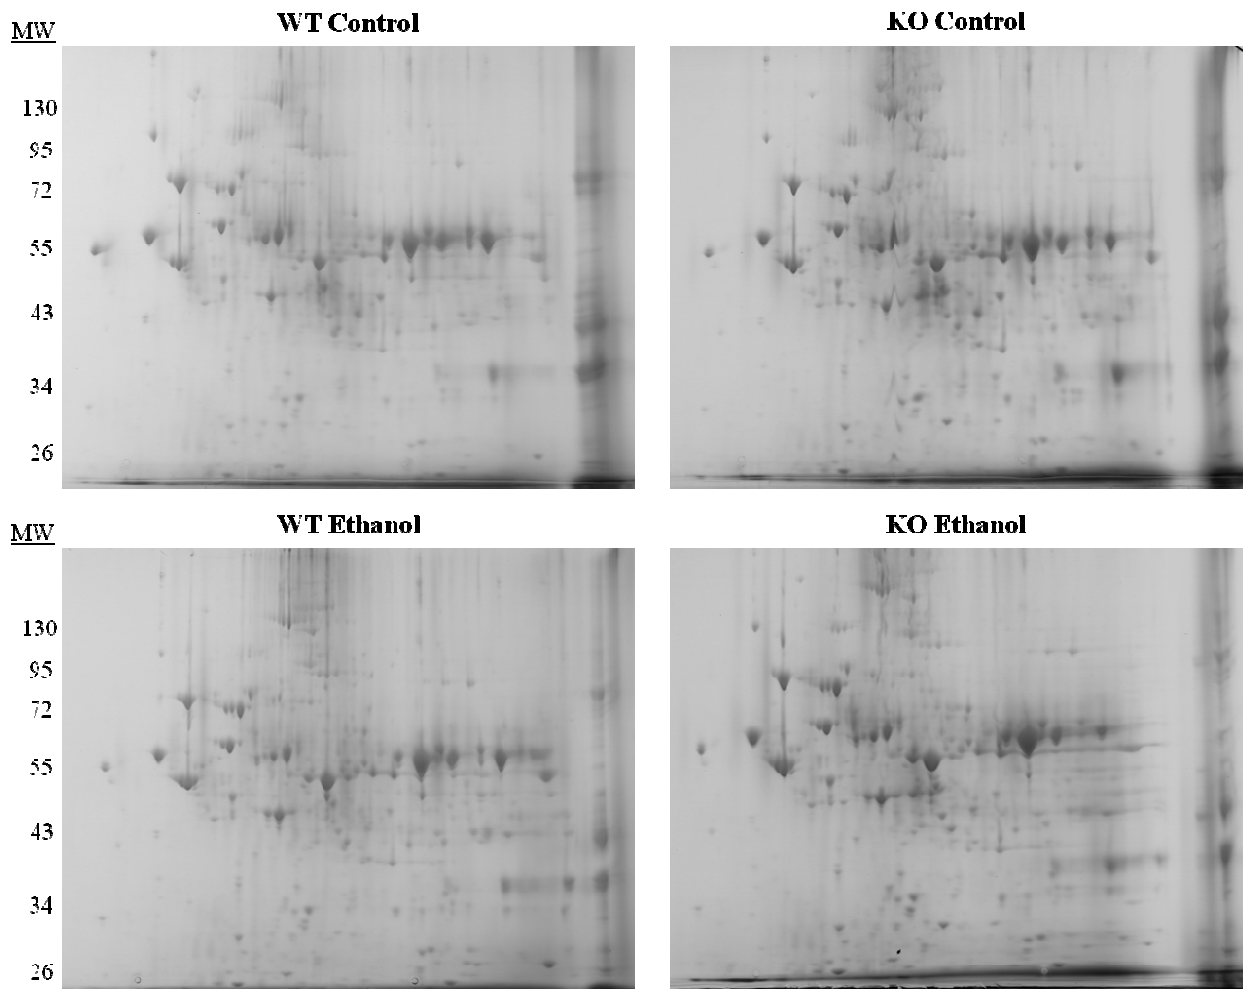

Supplement: NIHMS359444-supplement-1_si_001.pdf [file NIHMS359444-supplement-1_si_001.pdf]
